# Supplementary material
Source: PubMed Central journal article supplement (PMC7611354)
Supplement: EMS121613-supplement-1.pdf [file EMS121613-supplement-1.pdf]

A

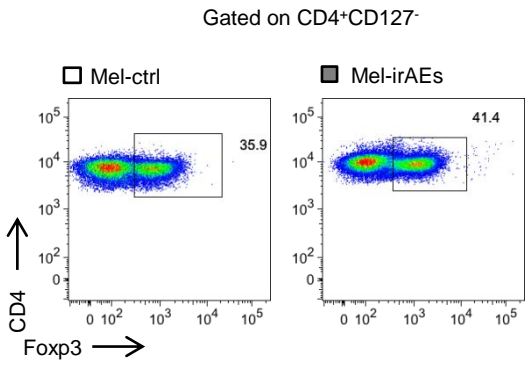

B

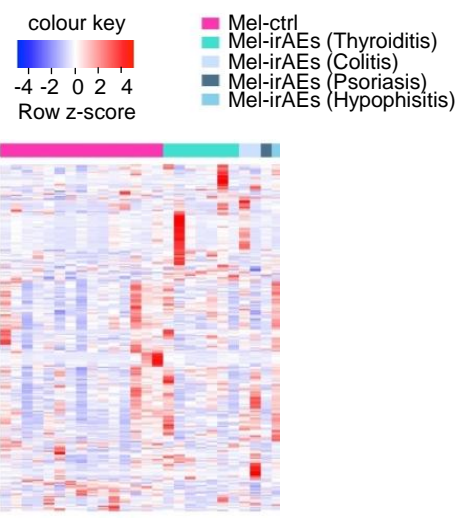

C

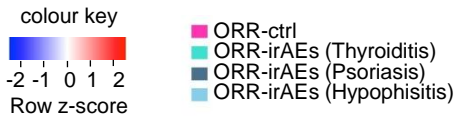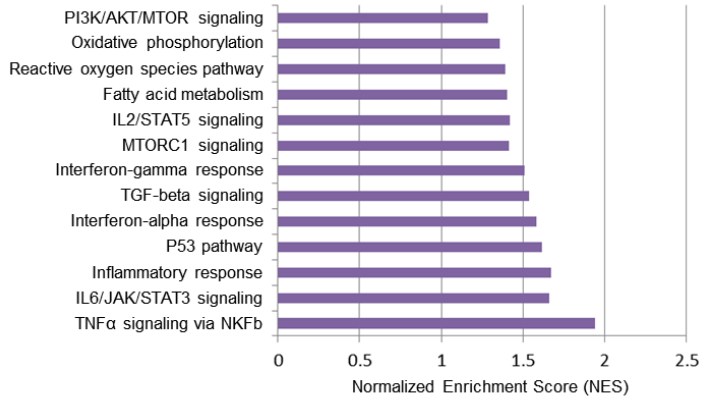

D

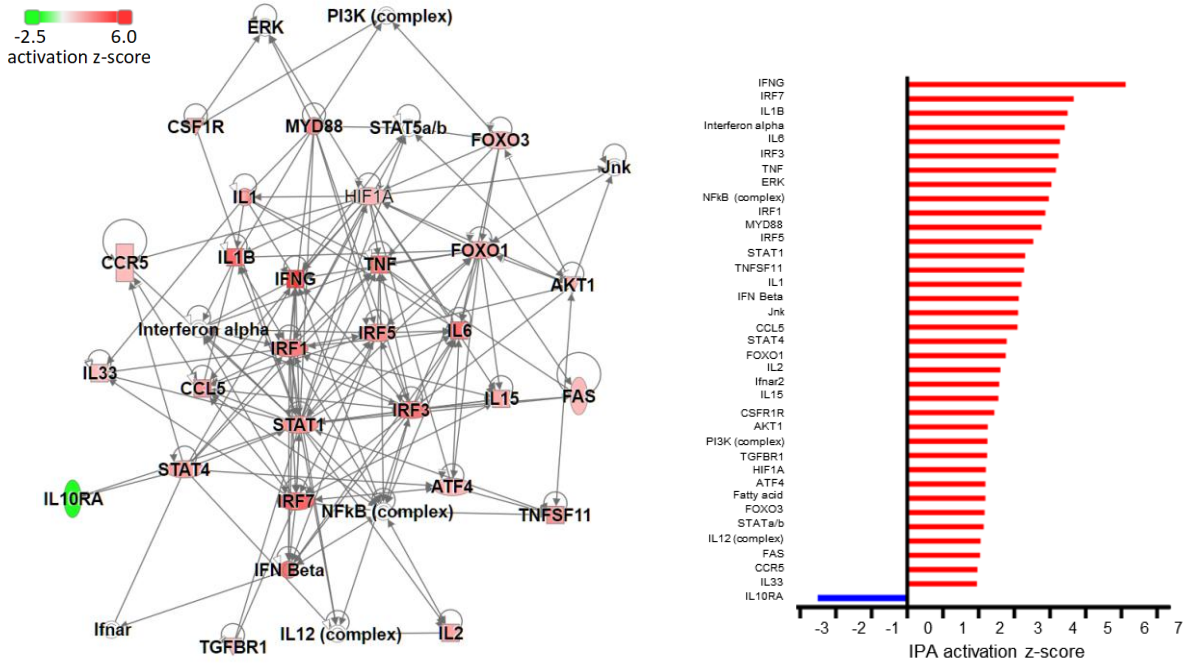

**Supplementary Figure 1. Enriched inflammatory pathways characterize Tregs in advanced melanoma individuals developing irAEs.** (A) Frequencies of CD4<sup>+</sup>CD25<sup>+</sup>CD127<sup>-</sup> Foxp3<sup>+</sup> Tregs in peripheral blood of individuals with advanced melanoma under anti-PD1: without irAEs (Mel-ctrl, n=11) and with irAEs (Mel-irAEs, n=9). For **B-D**, transcriptomic analysis of CD4<sup>+</sup>CD25<sup>+</sup>CD127<sup>-</sup> Tregs isolated from blood of advanced melanoma patients under anti-PD1 treatment. (B) Heatmap of DEGs of 'Mel-ctrl (n=15) vs Mel-irAEs (n=11)'. (C) Heatmap of DEGs from melanoma individuals 'ORR-ctrl (n=3) vs ORR-irAEs (n=4)' (upper panel); and GSEA analysis showing the positively enriched gene-sets (FDR<0.25; lower panel); Objective Response Rate (ORR) is defined as the proportion of patients with a complete or a partial response to therapy. (D) Upstream regulator network (left) and barplot (right) from the DEGs of 'Mel-ctrl vs Mel-irAEs' using IPA analysis; red represents activation in Mel-irAEs; green represents inactivation in Mel-irAEs; IPA activation z-score is to infer the activation states of predicted transcriptional regulators.

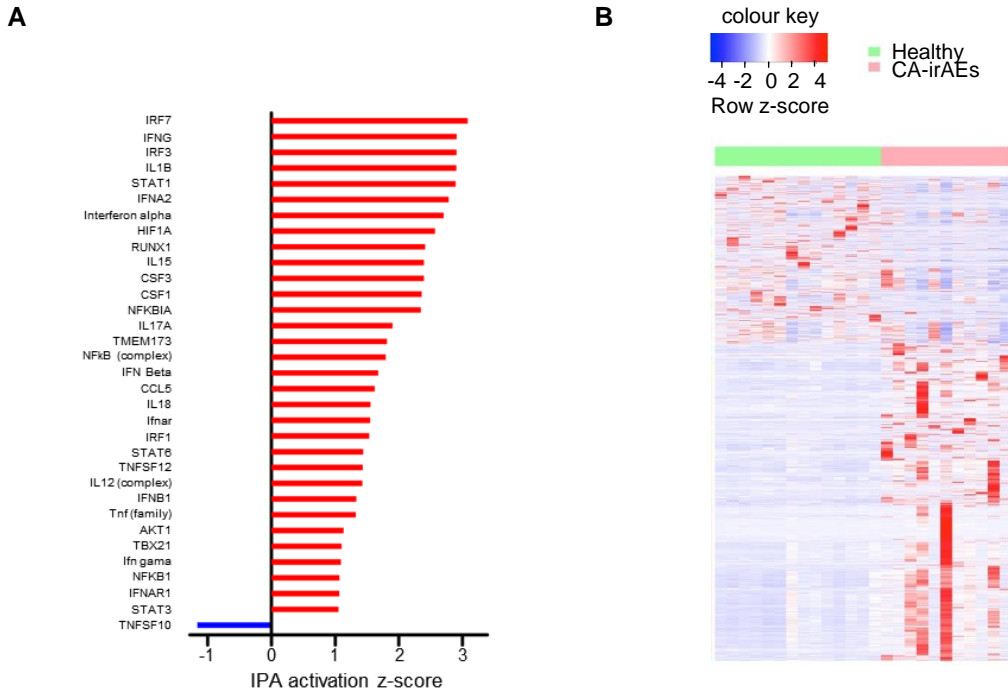

**Supplementary Figure 2. Distinct pro-inflammatory transcriptomic profile of irAEs Tregs among different type of cancers.** (A) Upstream regulator analysis from the DEGs of ‘CA-ctrl vs CA-irAEs’ treated anti-PD1 using IPA (IPA activation z-score is to infer the activation states of predicted transcriptional regulators). (B) Heatmap of DEGs in Tregs isolated from peripheral blood of ‘Healthy (n=14) vs CA-irAEs (n=11)’.

Supplementary Table 1

|                | ID  | Disease  | Sex | Age | Treatment      | irAEs        | Adjuvant/Metastatic | Response to ICI |
|----------------|-----|----------|-----|-----|----------------|--------------|---------------------|-----------------|
| Autoimmune     | A1  | HT       | M   | 55  | Levothyroxine  | N/A          | N/A                 | N/A             |
|                | A2  | HT       | F   | 52  | Levothyroxine  | N/A          | N/A                 | N/A             |
|                | A3  | HT       | F   | 63  | Levothyroxine  | N/A          | N/A                 | N/A             |
|                | A4  | HT       | F   | 57  | None           | N/A          | N/A                 | N/A             |
|                | A5  | RA       | F   | 36  | HCQ/AZA/PZ     | N/A          | N/A                 | N/A             |
|                | A6  | RA       | F   | 30  | MTx            | N/A          | N/A                 | N/A             |
|                | A7  | UC       | M   | 47  | 5-ASA STEROIDS | N/A          | N/A                 | N/A             |
|                | A8  | UC       | F   | 22  | Vedolizumab    | N/A          | N/A                 | N/A             |
|                | A9  | CD       | F   | 46  | None           | N/A          | N/A                 | N/A             |
|                | A10 | CD       | F   | 66  | AZA            | N/A          | N/A                 | N/A             |
|                | A11 | HT       | F   | 49  | Levothyroxine  | N/A          | N/A                 | N/A             |
|                | A12 | HT       | M   | 68  | Levothyroxine  | N/A          | N/A                 | N/A             |
|                | A13 | HT       | M   | 45  | none           | N/A          | N/A                 | N/A             |
|                | A14 | RA       | F   | 60  | none           | N/A          | N/A                 | N/A             |
|                | A15 | RA       | F   | 60  | HCQ            | N/A          | N/A                 | N/A             |
|                | A16 | RA       | F   | 54  | none           | N/A          | N/A                 | N/A             |
|                | A17 | RA       | M   | 68  | MTx            | N/A          | N/A                 | N/A             |
|                | A18 | RA       | M   | 78  | MTx            | N/A          | N/A                 | N/A             |
|                | A19 | RA       | F   | 77  | MTx            | N/A          | N/A                 | N/A             |
| RE3            | RA  | F        | 63  | MTx | N/A            | N/A          | N/A                 |                 |
| Melanoma irAEs | P14 | Melanoma | M   | 84  | aPD1           | Thyroiditis  | Metastatic          | CR              |
|                | P24 | Melanoma | F   | 66  | aPD1           | UC           | Metastatic          | PD              |
|                | P35 | Melanoma | M   | 61  | aPD1           | Thyroiditis  | Metastatic          | PD              |
|                | P36 | Melanoma | F   | 77  | aPD1           | Thyroiditis  | Metastatic          | PD              |
|                | P38 | Melanoma | F   | 41  | aPD1           | thyroiditis  | Adjuvant            | No recurrence   |
|                | P45 | Melanoma | F   | 63  | aPD1           | Thyroiditis  | Metastatic          | SD              |
|                | P46 | Melanoma | M   | 49  | aPD1           | Hypophysitis | Metastatic          | CR              |
|                | P6  | Melanoma | M   | 66  | aPD1           | UC           | Adjuvant            | Recurrence      |
|                | P62 | Melanoma | F   | 75  | aPD1           | Psoriasis    | Metastatic          | CR              |
|                | P9  | Melanoma | F   | 53  | aPD1           | Thyroiditis  | Metastatic          | CR              |
|                | P55 | Melanoma | F   | 71  | aPD1           | Thyroiditis  | Metastatic          | PD              |

|                         |          |            |    |      |             |                       |            |               |
|-------------------------|----------|------------|----|------|-------------|-----------------------|------------|---------------|
| <b>Melanoma Control</b> | P4       | Melanoma   | F  | 80   | aPD1        | N/A                   | Metastatic | CR            |
|                         | P11      | Melanoma   | M  | 69   | aPD1        | N/A                   | Metastatic | PD            |
|                         | P17      | Melanoma   | F  | 57   | aPD1        | N/A                   | Adjuvant   | Recurrence    |
|                         | P18      | Melanoma   | F  | 75   | aPD1        | N/A                   | Metastatic | CR            |
|                         | P41      | Melanoma   | M  | 41   | aPD1        | N/A                   | Adjuvant   | No recurrence |
|                         | P42      | Melanoma   | M  | 43   | aPD1        | N/A                   | Adjuvant   | No recurrence |
|                         | P47      | Melanoma   | M  | 70   | aPD1        | N/A                   | Adjuvant   | No recurrence |
|                         | P49      | Melanoma   | M  | 82   | aPD1        | N/A                   | Adjuvant   | No recurrence |
|                         | P52      | Melanoma   | F  | 76   | aPD1        | N/A                   | Metastatic | PD            |
|                         | P53      | Melanoma   | M  | 49   | aPD1        | N/A                   | Metastatic | PD            |
|                         | P54      | Melanoma   | M  | 35   | aPD1        | N/A                   | Adjuvant   | No recurrence |
|                         | P56      | Melanoma   | F  | 52   | aPD1        | N/A                   | Metastatic | PD            |
|                         | P57      | Melanoma   | M  | 66   | aPD1        | N/A                   | Adjuvant   | No recurrence |
| P60                     | Melanoma | M          | 62 | aPD1 | N/A         | Adjuvant              | Recurrence |               |
| P61                     | Melanoma | M          | 84 | aPD1 | N/A         | Metastatic            | PR         |               |
| <b>Cancer irAEs</b>     | P20      | CA Kidney  | M  | 36   | aPD1        | Arthritis             | N/A        | N/A           |
|                         | P21      | CA Bladder | M  | 55   | aPD1        | Thyroiditis           | N/A        | N/A           |
|                         | P33      | CA Kidney  | M  | 64   | aPD1        | Pneumonitis           | N/A        | N/A           |
|                         | P3       | NSCL CA    | F  | 65   | aPD1/PZ     | Pneumonitis           | N/A        | N/A           |
|                         | P39      | CA Kidney  | M  | 62   | aPD1        | Gastritis             | N/A        | N/A           |
|                         | PT1      | NSCL CA    | M  | 70   | aPD1        | Pneumonitis           | N/A        | N/A           |
|                         | PT4      | NSCL CA    | M  | 76   | aPD1        | Arthritis/Thyroiditis | N/A        | N/A           |
|                         | PT5      | NSCL CA    | F  | 64   | aPD1        | Pneumonitis           | N/A        | N/A           |
|                         | PT6      | NSCL CA    | M  | 79   | aPD1        | Thyroiditis/Arthritis | N/A        | N/A           |
|                         | PT7      | NSCL CA    | M  | 65   | aPD1        | Thyroiditis           | N/A        | N/A           |
| P8                      | CA Liver | M          | 67 | aPD1 | Thyroiditis | N/A                   | N/A        |               |
| <b>Cancer Control</b>   | P23      | CA Kidney  | M  | 71   | aPD1        | N/A                   | N/A        | N/A           |
|                         | P29      | CA Kidney  | F  | 78   | aPD1        | N/A                   | N/A        | N/A           |
|                         | P30      | CA Kidney  | F  | 64   | aPD1        | N/A                   | N/A        | N/A           |
|                         | P27      | CA Bladder | M  | 56   | aPD1        | N/A                   | N/A        | N/A           |
|                         | P40      | CA Bladder | M  | 54   | aPD1        | N/A                   | N/A        | N/A           |

HT: Hashimoto Thyroiditis, RA: Rheumatoid Arthritis, UC: Ulcerative Colitis, CD: Crohn's Disease,  
NSCL: Non Small Cell Lung, CA: Cancer, F: Female, M: Male  
HCQ: hydroxychloroquine, PZ: Prednisone, AZA: Azathioprine, MTx: Methotrexate  
SD: stable disease, PR: partial remission, CR: complete remission, PD: progressive disease

**Supplementary Table 1. Demographic and clinical characteristics of human subjects.**

Characteristics of human subjects recruited for the study. Individuals with Autoimmunity (n = 20),  
Melanoma irAEs (n = 11), Melanoma Control (n = 15), Cancer irAEs (n = 11) and Cancer control (n=5).
